# Supplementary material
Source: publisher figshare collection journal article supplement (https://gsajournals.figshare.com/articles/dataset/_/12034392)
Supplement: Supplementary file 1 [file 1]

## Sheet: Sheet1
Table S4
Gene ID	Gene Name	Base mean	log2(FC)	StdErr	Wald-Stats	P-value	P-adj	Description
WBGene00268211	T02H6.12	48.8519	1.62725	0.164701	9.88003	5.08159e-23	2.76794e-19	T02H6.12 is a pseudogene
WBGene00007097	B0024.4	489.102	1.1765	0.155086	7.58612	3.2962e-14	1.07727e-10	Tiling array and RNA sequencing studies indicate that B0024.4 is enriched in the intestine and in neurons including the dopaminergic, PVD, and OLL neurons.
WBGene00007131	pals-26	220.821	1.17347	0.161907	7.24782	4.2354e-13	9.88724e-10	Blast search = similiarity to Amyotrophic lateral sclerosis 2 (ALS2) family (an autosomal recessive form of juvenile ALS). pals-26 is expressed in the pharynx, hypodermis, nervous system, reproductive system, coelomocyte, intestine, rectal gland cell, and the body wall musculature.
WBGene00008739	F13D12.3	189.545	1.12464	0.166152	6.76873	1.2992e-11	2.35891e-08	F13D12.3 is expressed in the head and the rectal epithelium.
WBGene00016247	C30B5.6	145.36	1.06151	0.153965	6.89446	5.40696e-12	1.10444e-08	Tiling array and microarray studies indicate that C30B5.6 is enriched in the coelomocytes and excretory cell and in neurons including the GABAergic neurons.
WBGene00011446	T04F8.8	78.5178	0.997438	0.159336	6.25996	3.8507e-10	5.72039e-07	Tiling array studies indicate that T04F8.8 is enriched in the dopaminergic and GABAergic neurons.
WBGene00014173	ZK970.7	339.858	0.979209	0.14989	6.53285	6.45283e-11	1.05446e-07	ZK970.7 encodes, along with C06A8.3, one of two C. elegans proteins with similarity to the Onchocerca volvulus Ov17 hypodermal antigen; ZK970.7 expression increases in lin-35; slr-2 doubly mutant animals and in response to stressors such as ionizing radiation and bacterial infection.
WBGene00013481	Y69H2.3	455.795	0.976368	0.159063	6.13824	8.34409e-10	1.13626e-06	Tiling array, RNA sequencing, and microarray studies indicate that Y69H2.3 is enriched in the coelomocytes, excretory cell, AB, amphid sheath cell, germ line, and male-specific tissues and in the I5, DA, SAB, and retrovesicular ganglion.
WBGene00010135	F55H12.4	288.189	0.932674	0.16066	5.80526	6.42652e-09	7.00105e-06	F55H12.4 is expressed in the pharynx, anus, hypodermis, and the vulva.
WBGene00017127	E04F6.8	74.8721	0.923332	0.164782	5.60335	2.10254e-08	2.02104e-05	Tiling array, RNA sequencing, and microarray studies indicate that E04F6.8 is enriched in the coelomocytes, excretory cell, hypodermis, muscle cell, intestine, and hermaphrodite-specific tissues and in the dopaminergic, GABAergic, ASER, and PLM neurons.
WBGene00007454	C08F11.7	19.5175	0.920554	0.164988	5.57951	2.41196e-08	2.07442e-05	Tiling array and RNA sequencing studies indicate that C08F11.7 is enriched in the coelomocytes and germ line and in the AVA neurons.
WBGene00018729	F53A9.6	46.1148	0.897721	0.152911	5.87086	4.33533e-09	5.06026e-06	F53A9.6 is involved in innate immune response[HEP]
WBGene00018725	kreg-1	77.4782	0.888442	0.148225	5.99388	2.04896e-09	2.57554e-06	(kreg-1)F53A9.2 encodes a novel protein containing polyhistidine stretches; F53A9.2 activity is required for the stress response to copper ion, and in that pathway, is a downstream target of the FOS-1 transcription factor that binds directly to the F53A9.2 promoter; an F53A9.2 promoter fusion is weakly expressed in the intestine, but expression is upregulated in the intestine following exposure t…
WBGene00021977	Y58A7A.3	226.18	0.887455	0.169071	5.249	1.52929e-07	0.000108653
WBGene00007132	pals-27	101.7	0.844797	0.168353	5.018	5.22111e-07	0.000294201	Tiling array and RNA sequencing studies indicate that pals-27 is enriched in the body wall muscle cell, coelomocytes, excretory cell, gon_male_dtc posterior, gon_male_dtc anterior, Z1.p, Z4.a, Z4, and Z1 and in the dopaminergic neurons.
WBGene00017506	F16B4.4	206.033	0.839615	0.150401	5.5825	2.37079e-08	2.07442e-05
WBGene00012185	W01F3.2	110.988	0.839603	0.148337	5.66011	1.51278e-08	1.54503e-05
WBGene00018730	F53A9.7	47.6551	0.817398	0.150988	5.41366	6.17481e-08	4.58648e-05
WBGene00022231	tyr-6	166.031	0.816753	0.163644	4.99104	6.00559e-07	0.000322917	tyr-6 is orthologous to the human gene tyrosinase (TYR), which is involved in the conversion of tyrosine to melanin.
WBGene00011772	T14G8.4	34.3759	0.803922	0.154508	5.20312	1.95975e-07	0.000128097
WBGene00008301	pals-39	33.3853	0.786044	0.141449	5.5571	2.74296e-08	2.24113e-05	Tiling array studies indicate that pals-39 is enriched in the intestine and in the DA, VA, and dopaminergic neurons.
WBGene00012961	Y47H10A.5	178.462	0.7806	0.140865	5.54149	2.9991e-08	2.33373e-05
WBGene00022236	Y73B6BL.12	42.7172	0.775424	0.168177	4.61076	4.01209e-06	0.00139493
WBGene00015046	nlp-34	157.8	0.772445	0.156685	4.92991	8.2267e-07	0.000407371	Tiling array and RNA sequencing studies indicate that nlp-34 is enriched in the germline precursor cell, hypodermis, intestine, and pharyngeal muscle cell and in the AFD, ASER, and RID neurons.
WBGene00202514	T09F5.20	48.0783	0.767594	0.168897	4.54475	5.5001e-06	0.00183423
WBGene00004222	ptr-8	126.582	0.751057	0.145164	5.17386	2.29302e-07	0.000144116	ptr-8 encodes a nematode-specific member of the sterol sensing domain (SSD) proteins, distantly paralogous to Drosophila PATCHED (PTC) and human PTCH (OMIM:601309, mutated in basal cell nevus syndrome); PTR-8 is weakly required for normal molting from L4 to adult stages; PTR-8 is also required for normal growth to full size and locomotion; PTR-8 is expressed in hypodermis.
WBGene00016147	cyp-32A1	82.8854	0.749915	0.153684	4.87958	1.06314e-06	0.000496365	cyp-32A1 is an ortholog of human CYP19A1 (cytochrome P450 family 19 subfamily A member 1) and CYP4V2 (cytochrome P450 family 4 subfamily V member 2); cyp-32A1 is predicted to have heme binding activity, iron ion binding activity, and oxidoreductase activity, acting on paired donors, with incorporation or reduction of molecular oxygen, based on protein domain information
WBGene00010686	K08F9.3	35.1396	0.748815	0.15996	4.68126	2.85111e-06	0.00110929
WBGene00000545	clp-4	989.107	0.744308	0.16689	4.45988	8.20045e-06	0.00243643	clp-4 encodes a large calpain subunit that is homologous to Drosophila CalpainB and the mammalian muscle-specific Calpain 3 proteins (OMIM:114240, mutations are associated with limb-girdle muscular dystrophy); by homology, CLP-4 is predicted to function as a nonlysosomal, calcium-dependent, cysteine protease that is involved in intracellular proteolysis and peptidolysis; however, as loss of clp-4…
WBGene00012593	nspe-7	69.2272	0.743426	0.14194	5.23762	1.62662e-07	0.000110753	Tiling array and RNA sequencing studies indicate that nspe-7 is enriched in the hypodermis and intestine and in the AFD and PLM neurons.
WBGene00014136	ZK896.5	70.6444	0.733658	0.161641	4.53881	5.65713e-06	0.00184886
WBGene00007506	C10C5.2	30.6516	0.731346	0.154184	4.74332	2.10246e-06	0.000858907
WBGene00016788	C49G7.10	51.0856	0.72284	0.144939	4.9872	6.12596e-07	0.000322917
WBGene00138721	pals-37	30.1868	0.7157	0.141514	5.05743	4.24933e-07	0.000257179	RNA sequencing and microarray studies indicate that pals-37 is affected by Ethanol, Cry5B, and Colistin; RNA sequencing studies indicate that pals-37 is enriched in the intestine
WBGene00000560	cnc-6	69.8863	0.708441	0.147843	4.79186	1.65242e-06	0.000710583	cnc-6 encodes one of eleven C. elegans caenacin peptides; cnc-6 expression is strongly induced after infection by the fungus Drechmeria coniospora, suggesting that it functions as a secreted antimicrobial peptide in the innate immune response.
WBGene00020471	pho-14	63.4099	0.708366	0.160388	4.41658	1.00276e-05	0.00268623	pho-14 is an ortholog of human ACP2 (acid phosphatase 2, lysosomal), ACPT (acid phosphatase, testicular) and ACPP (acid phosphatase, prostate); pho-14is expressed in the anal depressor muscle, intestinal muscle, and the body wall musculature.
WBGene00001770	gst-22	62.2263	0.707669	0.1586	4.46197	8.12094e-06	0.00243643	gst-22 is an ortholog of members of the human GST (Soluble glutathione S-transferases) family including HPGDS; tiling array, RNA sequencing, and microarray studies indicate that gst-22 is enriched in the intestine, pharyngeal muscle cell, and muscle cell.
WBGene00007203	best-1	89.0644	0.703381	0.168009	4.18656	2.8322e-05	0.00617079	best-1 is an ortholog of human Best4 (bestrophin 4), Best2 (bestrophin 2) and Best1 (bestrophin 1); tiling array studies indicate that best-1 is enriched in the excretory cell and germline precursor cell and in the GABAergic neurons.
WBGene00013489	col-42	125.76	0.698327	0.14426	4.84074	1.29355e-06	0.000587166	col-42 is an ortholog of human MARCO (macrophage receptor with collagenous structure); col-42 is a structural constituent of cuticle, based on protein domain information.
WBGene00044900	cnc-11	38.9876	0.687432	0.138329	4.96953	6.71146e-07	0.000342725	cnc-11 encodes one of eleven C. elegans caenacin peptides; CNC-11 is predicted to be a secreted protein that functions as an antimicrobial peptide in the innate immune response; cnc-11 expression is upregulated in response to infection with the fungus Drechmeria coniospora and also in response to injury (needle wounding); cnc-11 expression is also modestly upregulated in response to osmotic stres…
WBGene00009130	F25H5.8	30.2938	0.686067	0.135872	5.04937	4.43262e-07	0.000258691
WBGene00019744	M02H5.8	41.0497	0.683946	0.155568	4.39644	1.10038e-05	0.00290022
WBGene00008726	F13A7.11	58.6713	0.683671	0.158943	4.30136	1.69754e-05	0.00402022
WBGene00000677	col-103	65.4456	0.683372	0.160361	4.26147	2.0309e-05	0.00454616	col-103 encodes a collagen.
WBGene00000535	cpi-1	308.037	0.682781	0.148993	4.58263	4.59175e-06	0.0015632	cpi-1 encodes a homolog of cysteine protease inhibitors (cystatins); cpi-1 is at least superficially dispensable for viability and gross morphology.
WBGene00016505	ttr-33	67.3326	0.673706	0.150347	4.48102	7.42879e-06	0.0023573
WBGene00003765	nlp-27	65.9854	0.672834	0.137624	4.88893	1.01386e-06	0.000487279	nlp-27 encodes a predicted neuropeptide with homology to C. elegans nlp-28 through nlp-31.
WBGene00008602	oac-14	202.697	0.670317	0.153255	4.37386	1.2207e-05	0.00311679
WBGene00001149	bcat-1	515.11	0.669995	0.168863	3.96769	7.25737e-05	0.0126162	This gene encodes a protein predicted by Eisenberg and coworkers, with 52% accuracy, to be mitochondrial.
WBGene00012947	Y47H9C.1	190.133	0.668641	0.141434	4.72759	2.27205e-06	0.00090555
WBGene00012592	Y38E10A.14	191.897	0.668027	0.14452	4.62239	3.79347e-06	0.00136315	Y38E10A.14 encodes a novel protein.
WBGene00020566	ttr-7	76.1719	0.667942	0.152279	4.38631	1.15291e-05	0.00299042
WBGene00011707	T11B7.2	51.6516	0.667048	0.168402	3.96105	7.46213e-05	0.0127019
WBGene00044206	T26H5.9	15.2892	0.664681	0.14387	4.62001	3.83728e-06	0.00136315
WBGene00017467	F14F9.4	128.806	0.662632	0.153116	4.32765	1.5071e-05	0.00362168
WBGene00012297	W06D4.3	22.0981	0.660904	0.162629	4.06387	4.82661e-05	0.00938948
WBGene00016862	C52A10.1	199.333	0.658396	0.147043	4.47758	7.54945e-06	0.0023573
WBGene00001478	fmo-3	142.797	0.656964	0.164011	4.00561	6.18582e-05	0.0113576	fmo-3 encodes a flavin-containing monoxygenase homologous to human FMO1, FMO2, and FMO3 (OMIM:602079, mutated in trimethylaminuria).
WBGene00003767	nlp-29	333.765	0.652448	0.152992	4.2646	2.00261e-05	0.00454509	nlp-29 encodes an antimicrobial, neuropeptide-like protein; nlp-29 appears to play a role in innate immunity, as its expression in the epidermis is strongly induced following fungal infection; nlp-29 expression is also induced following physical injury and osmotic stress; nlp-29 expression following fungal infection or physical wounding is regulated by a TIR-1, (Toll-interleukin 1 receptor (TIR) …
WBGene00007365	C06B3.6	128.715	0.639156	0.163879	3.90016	9.61292e-05	0.0156195
WBGene00009984	F53F1.6	32.8731	0.638842	0.137999	4.62932	3.66869e-06	0.0013625
WBGene00013636	Y105C5A.12	20.1308	0.638418	0.155429	4.10746	4.00031e-05	0.00827457
WBGene00006539	tbb-6	79.0329	0.635792	0.14278	4.45296	8.4695e-06	0.00247143	tbb-6 is an ortholog of human TUBB1 (tubulin beta 1 class VI) and TUBB8 (tubulin beta 8 class VIII); tbb-6 is predicted to have GTP binding activity, GTPase activity, and is a structural constituent of cytoskeleton, based on protein domain information; tbb-6 is expressed in the pharynx.
WBGene00011894	ttr-23	33.3279	0.634007	0.143439	4.42005	9.8679e-06	0.00268623
WBGene00005188	srg-31	27.8601	0.630567	0.158889	3.9686	7.22964e-05	0.0126162	srg-31 is predicted to have transmembrane signaling receptor activity, based on protein domain information.
WBGene00012624	fbxa-150	108.11	0.628087	0.167546	3.74874	0.000177723	0.0246116	The F-box motif consists of roughly 50 amino acids. There are at least 11 F-box genes encoded by the genome of budding yeast, 22 in Drosophila, and 38 in human beings; but a striking 326 F-box genes are predicted to exist in C. elegans, comprising 1.6% of the protein-coding genome. This disproportionate number of F-box genes is paralleled by the number of Skp-1 homologs (which are potential F-box…
WBGene00011185	R10D12.1	454.362	0.625361	0.168895	3.70267	0.000213342	0.0276685
WBGene00044536	F14F9.8	24.6569	0.623378	0.152644	4.08387	4.42925e-05	0.00882663
WBGene00012118	grsp-2	120.631	0.620431	0.161651	3.8381	0.000123989	0.0183235	grsp-2 encodes a glycine-rich protein, predicted to be secreted; grsp-2 transcript levels are up-regulated in response to infection with the fungus Drechmeria coniospora.
WBGene00010446	K01A6.4	18.7015	0.618897	0.138305	4.47488	7.64559e-06	0.0023573
WBGene00012101	zip-10	93.6642	0.617547	0.1548	3.98931	6.62649e-05	0.0118993	zip-10 is involved in innate immune response[HEP]; zip-10 is expressed in the nervous system and the intestine.
WBGene00019660	K11H12.4	118.959	0.606467	0.136879	4.43068	9.39379e-06	0.00260176
WBGene00002269	lec-6	962.499	0.6064	0.157087	3.86028	0.000113258	0.0176262	lec-6 encodes a 'proto' type galectin (beta-galactosyl-binding lectin) containing a single carbohydrate recognition domain; by homology, LEC-6 may play roles in cell adhesion and aggregation, proliferation, or programmed cell death, but as loss of lec-6 activity via large-scale RNAi screens does not result in obvious abnormalities, the precise role of LEC-6 in C. elegans development and/or behavi…
WBGene00009405	F35C11.6	63.808	0.605717	0.169144	3.58106	0.000342199	0.0423627
WBGene00020774	T24E12.5	34.8303	0.601946	0.167979	3.58346	0.000339074	0.0422962
WBGene00018724	F53A9.1	26.4533	0.601157	0.135352	4.44142	8.93665e-06	0.00251783
WBGene00007648	folr-1	17.9692	0.600088	0.128983	4.65247	3.27976e-06	0.00124639	Tiling array studies indicate that folr-1 is enriched in the NSM neurons.
WBGene00005657	srr-6	59.4203	0.593253	0.15215	3.89913	9.65404e-05	0.0156195	srr-6 is expressed in the pharynx, nervous system, reproductive system, intestine, rectal gland cell, and the excretory cell.
WBGene00017727	F22H10.3	184.915	0.592938	0.158731	3.73549	0.000187348	0.0257266
WBGene00006987	zmp-1	95.4897	0.591442	0.16913	3.49697	0.000470582	0.054927	ZMP-1 might be held in the cell membrane after secretion by a glycosylphosphatidylinositol anchor. Overexpression of FOS-1A restores ZMP-1 expression in AC but does not induce ZMP-1 expression ectopically, indicating that FOS-1A is necessary but not sufficient for ZMP-1 expression. zmp-1 expression is under complex regulation by several transcription factors: in vulA, it requires NHR-67; in vulD,…
WBGene00011423	ipla-7	622.277	0.590727	0.167108	3.535	0.000407773	0.0486381	T04B2.5 encodes a phospholipase A2.
WBGene00018731	F53A9.8	51.4674	0.589535	0.147286	4.00267	6.26327e-05	0.011372
WBGene00000673	col-98	66.0603	0.588202	0.153102	3.84189	0.000122089	0.0183235	col-98 is a structural constituent of cuticle, based on protein domain information.
WBGene00050875	bah-1	39.3591	0.587604	0.137676	4.26803	1.97211e-05	0.0045389	bah-1 encodes a protein with a DUF23 domain, a domain found in insects, plants, bacteria and two vertebrates, the frog and the fish, Tetraodon, but absent from mammalian genomes; bah-1 normally functions to contribute to the integrity of the nematode cuticle; bah-1 is also required for the surface characteristics of the elegans cuticle that are required for the binding of bacterial biofilms; bah-…
WBGene00000783	cpr-3	85.1298	0.586722	0.134608	4.35876	1.30804e-05	0.00323858	cpr-1 is an ortholog of human CTSB (cathepsin B); cpr-3 is involved in innate immune response[HEP]; cpr-3 is predicted to have cysteine-type peptidase activity, based on protein domain information; cpr-3 is expressed in the pharynx, pharyngeal-intestinal valve, intestine, and the rectal gland cell.
WBGene00006627	tsp-1	122.446	0.585322	0.168315	3.47754	0.000506034	0.0578259	tsp-1 is an ortholog of human TSPAN11 (tetraspanin 11), TSPAN12 (tetraspanin 12) and CD151 (CD151 molecule (Raph blood group)); tsp-1 is involved in innate immune response[HEP].
WBGene00020760	T24C4.4	44.8617	0.581389	0.151383	3.84053	0.00012277	0.0183235
WBGene00007913	cyp-36A1	31.1004	0.579344	0.141555	4.0927	4.26387e-05	0.00860584	cyp-36A1 is an ortholog of human RP11-400G3.5 and members of the CYP2 (Cytochrome P4502) family including CYP2C9; cyp-36A1 is predicted to have heme binding activity, iron ion binding activity, and oxidoreductase activity, acting on paired donors, with incorporation or reduction of molecular oxygen, based on protein domain information.
WBGene00009434	F35E12.10	72.4522	0.578328	0.133519	4.33143	1.48143e-05	0.00361313	F35E12.5 encodes a CUB-like domain-containing protein; F35E12.5 is involved in the transcriptional, innate immune response towards several different bacterial pathogens.
WBGene00010456	K01C8.1	44.212	0.572404	0.144373	3.96475	7.3474e-05	0.0126383
WBGene00020335	ttr-30	85.1207	0.570823	0.148407	3.84634	0.000119893	0.0183101
WBGene00011561	ttr-15	756.909	0.568751	0.145786	3.90126	9.56934e-05	0.0156195
WBGene00008988	F20G2.5	76.7113	0.568078	0.14951	3.79959	0.000144933	0.0209589
WBGene00010630	ttll-15	16.3461	0.567639	0.138699	4.09259	4.26579e-05	0.00860584	There is a possible antagonism between tubulin polyaminoacid ligases (e.g., tubulin polyglutamylases or polyglycylases) and tubulin carboxypeptidases, analogous to the antagonism between protein kinases and protein phosphatases. If this analogy were valid, it might then be the case that tubulin carboxypeptidases shared common substrates with tubulin ligases. While the best-known substrate for the…
WBGene00008922	F17C11.11	129.454	0.565036	0.168173	3.35985	0.000779851	0.0777045
WBGene00016095	C25E10.5	114.611	0.560926	0.14578	3.84776	0.000119203	0.0183101
WBGene00018803	fbxa-24	84.5349	0.559394	0.144125	3.88131	0.000103897	0.0164832	Microarray, tiling array, and RNA sequencing studies indicate that fbxa-24 is enriched in the ventral nerve cord, hypodermis, and intestine and in neurons including the PVD, OLL, dopaminergic, AFD, ASER, and PLM neurons.
WBGene00000733	col-160	66.7422	0.557195	0.157423	3.53949	0.000400906	0.0483778	col-160 is an ortholog of human MARCO (macrophage receptor with collagenous structure); col-160 is a structural constituent of cuticle, based on protein domain information.
WBGene00016164	C27D9.2	23.8926	0.557084	0.125421	4.44171	8.92449e-06	0.00251783
WBGene00014183	ZK1025.3	110.957	0.555442	0.132483	4.19256	2.75819e-05	0.00609076
WBGene00020579	T19D12.4	1470.71	0.553617	0.149037	3.71463	0.000203504	0.0266037
WBGene00045416	Y37H2A.14	27.5042	0.552547	0.128879	4.28731	1.80847e-05	0.00422174
WBGene00007142	ttr-18	247.584	0.552189	0.164144	3.36406	0.000768039	0.0769971
WBGene00016417	C34F11.8	22.0276	0.551943	0.12647	4.36421	1.27583e-05	0.00320744
WBGene00011979	T24B8.5	16.0357	0.550238	0.163393	3.36758	0.000758301	0.0764901	T24B8.5 encodes an ShK-like toxin peptide containing a domain rich in cysteine residues found in the sea anemone potassium channel inhibitor ShK; T24B8.5 expression is regulated by the PMK-1/p38 MAPK signaling pathway and the ATF-7 transcription factor, which is a downstream target of PMK-1.
WBGene00019113	F59E11.7	26.2051	0.546301	0.159439	3.4264	0.000611633	0.0666313
WBGene00018145	F37C4.5	831.583	0.544729	0.168895	3.22525	0.00125865	0.11178
WBGene00015227	ddn-1	43.0466	0.53968	0.166122	3.24869	0.00115938	0.105841	Tiling array, RNA sequencing, and microarray studies indicate that ddn-1 is enriched in the body wall muscle cell, cephalic sheath cell, coelomocytes, excretory cell, intestine, muscle cell, and hermaphrodite-specific tissues and in the DA, VA, dopaminergic, I5, SAB, and retrovesicular ganglion.
WBGene00013215	Y54G11A.4	87.4378	0.539176	0.155367	3.47035	0.000519787	0.0583596
WBGene00018823	F54E2.1	155.964	0.535197	0.154258	3.4695	0.000521419	0.0583596
WBGene00022797	best-24	137.356	0.534961	0.158215	3.38123	0.000721613	0.0741628	Best-24 is an ortholog of human Best4 (bestrophin 4), Best2 (bestrophin 2) and Best1 (bestrophin 1); best-24 is expressed in the hypodermis, nervous system, and the intestine.
WBGene00018268	F41C3.2	469.14	0.534427	0.169126	3.15994	0.00157801	0.129005
WBGene00017270	numr-1	88.6741	0.530327	0.13075	4.05602	4.99156e-05	0.00952481	(NUclear localized Metal Responsive) numr-1 is expressed in the pharynx, uterine muscle, all sensory neurons, intestine, vulval muscle, and the head neurons.
WBGene00017267	numr-2	89.054	0.5299	0.130677	4.05503	5.01275e-05	0.00952481
WBGene00008139	C47D12.5	49.081	0.529069	0.161193	3.28222	0.00102994	0.0972851
WBGene00016662	C45B2.8	20.5386	0.526911	0.127631	4.12837	3.65336e-05	0.00765379
WBGene00022645	ZK6.11	291.673	0.526076	0.139276	3.77721	0.000158593	0.0225354
WBGene00018966	F56D2.5	44.3006	0.519172	0.168588	3.07953	0.00207327	0.158314
WBGene00004172	pqn-92	110.938	0.518572	0.165667	3.13022	0.00174678	0.139239	Proteins bearing such domains can sometimes stably exist in at least two distinct physical states, each associated with a different phenotype; propagation of one of these traits is achieved by a self-perpetuating change in the protein from one form to the other, mediated by conformational changes in the glutamine/asparagine-rich domain. Prion domains are both modular and transferable to other pro…
WBGene00021518	hpo-6	103.66	0.516878	0.138802	3.72386	0.000196202	0.0262799	Microarray, tiling array, and RNA sequencing studies indicate that hpo-6 is enriched in the intestine and pharyngeal muscle cell and in the PVD and OLL neurons.
WBGene00000558	cnc-4	305.785	0.51618	0.138699	3.72157	0.000197986	0.0263032	cnc-4 encodes one of eleven C. elegans caenacin peptides; cnc-4 expression is strongly induced after infection by the fungus Drechmeria coniospora, suggesting that it functions as a secreted antimicrobial peptide in the innate immune response.
WBGene00003606	nhr-7	91.0193	0.515079	0.168069	3.0647	0.00217891	0.162583	nhr-7 encodes one of over 200 C. elegans nuclear receptors; nhr-7 appears to belong to a class of nematode-specific nuclear receptors.
WBGene00044457	C18H7.11	81.2858	0.51479	0.130566	3.94276	8.05496e-05	0.0135697
WBGene00003999	pgp-5	89.0353	0.51458	0.149441	3.44336	0.000574534	0.0630098	pgp-5 encodes a transmembrane protein that is a member of the P-glycoprotein subclass of the ATP-binding cassette (ABC) transporter superfamily; by homology, PGP-5 is predicted to function as an ATP-dependent efflux pump that protects C. elegans by exporting exogenous toxins; pgp-5 activity is required for defense response to both Gram-negative and Gram-positive bacteria as well as for the respon…
WBGene00002267	lec-4	183.148	0.513486	0.165488	3.10286	0.0019166	0.150573	lec-4 encodes a predicted galectin that exhibits sugar binding properties in vitro.
WBGene00016419	tyr-4	125.742	0.512039	0.157495	3.25113	0.00114945	0.105524	tyr-4 is an ortholog of human DCT (dopachrome tautomerase), TYRP1 (tyrosinase related protein 1) and TYR (tyrosinase); tyr-4 is predicted to have oxidoreductase activity, based on protein domain information.
WBGene00009383	F35B12.3	39.4792	0.51186	0.15773	3.24516	0.00117384	0.106555
WBGene00044724	R02E4.3	606.729	0.510808	0.155859	3.27738	0.00104777	0.0980495
WBGene00000522	clc-1	162.517	0.510045	0.151455	3.36763	0.000758173	0.0764901	Ultrastructurally, pharyngeal CLC-1 might be located in an intercellular junction region localized more apically than the zonula adherens-like 'apical junctions', with membranes closely apposed.
WBGene00023486	K08B4.7	22.0127	0.508513	0.13639	3.72837	0.00019272	0.0262436
WBGene00004144	pqn-60	35.3024	0.50712	0.122783	4.13023	3.62407e-05	0.00765379	The protein product of this gene is predicted to contain a glutamine/asparagine (Q/N)-rich ('prion') domain, by the algorithm of Michelitsch and Weissman (as of the WS77 release of WormBase, i.e., in wormpep77). Proteins bearing such domains can sometimes stably exist in at least two distinct physical states, each associated with a different phenotype; propagation of one of these traits is achiev…
WBGene00007439	C08E8.3	29.5333	0.505636	0.125142	4.04049	5.33402e-05	0.0100188
WBGene00000903	daf-7	45.716	0.504579	0.152134	3.31668	0.000910955	0.0882395	daf-7 encodes a member of the transforming growth factor beta superfamily; in C. elegans, DAF-7 functions as part of a signaling pathway that interprets environmental conditions to regulate energy-balance pathways that affect dauer larval formation, adult lifespan, fat metabolism, egg laying, pathogen avoidance behavior, and feeding behavior; daf-7 reporter gene fusions are expressed in the ASI, …
WBGene00018702	F52E4.5	478.898	0.504476	0.16452	3.06635	0.00216688	0.162427
WBGene00002103	ins-20	19.5233	0.504034	0.121192	4.15896	3.19705e-05	0.00687407	ins-20 encodes predicted type-alpha insulin-like molecule that lacks a C peptide domain and does not have an A6/A11 disulfide bond.
WBGene00000720	col-147	37.9758	0.498858	0.138407	3.60429	0.000313008	0.03965	col-147 is an ortholog of human SFTPD (surfactant protein D); col-147 is a structural constituent of cuticle, based on protein domain information.
WBGene00010166	gmd-2	52.197	0.497542	0.130023	3.82656	0.000129947	0.0189595	gmd-2 encodes one of two C. elegans GDP-mannose dehydratases; in vitro, and when coexpressed with GER-1, GMD-2 catalyzes the formation of GDP-fucose from GDP-mannose; gmd-2 transcripts are generally present throughout larval and adult stages.
WBGene00018470	F45E4.5	116.613	0.495111	0.158503	3.12366	0.00178615	0.141687
WBGene00271815	K04A8.21	34.6083	0.492831	0.126751	3.88817	0.000101002	0.0161811
WBGene00000784	cpr-4	127.903	0.490356	0.141771	3.45878	0.000542633	0.0603209	cpr-4 encodes a cathepsin B-like cysteine protease expressed at all life stages.
WBGene00003769	nlp-31	665.231	0.490153	0.144759	3.38599	0.000709208	0.0733491	nlp-31 encodes five predicted neuropeptide-like proteins; in C. elegans, nlp-31 is part of the YGGWamide neuropeptide family that also contains nlp-24, nlp-25, and nlp-27-32; nlp-31 is expressed in the hypodermis, and its expression is also detected in precomma-stage embryos; nlp-31 expression is upregulated in response to fungal infection and, when synthesized in vitro, demonstrates antifungal a…
WBGene00016781	C49G7.3	19.5748	0.48819	0.119789	4.07543	4.59293e-05	0.00904254
WBGene00018697	F52E1.9	324.026	0.486242	0.151089	3.21824	0.0012898	0.113315
WBGene00044737	ttr-45	112.479	0.48591	0.152229	3.19197	0.00141306	0.118414
WBGene00013008	clec-146	24.0864	0.485814	0.146047	3.32643	0.000879666	0.0860756
WBGene00021978	Y58A7A.4	88.3483	0.484838	0.140311	3.45544	0.000549389	0.0606593
WBGene00017417	F13B6.2	35.5804	0.484479	0.132716	3.65048	0.000261746	0.0336787
WBGene00008032	C39E9.8	124.591	0.483425	0.153609	3.14711	0.00164894	0.13348
WBGene00022848	ZK1055.7	420.711	0.48277	0.156494	3.08491	0.00203611	0.156944
WBGene00013181	Y53H1B.2	116.331	0.481018	0.140581	3.42163	0.000622459	0.0673616
WBGene00012364	zmp-4	34.665	0.474605	0.127697	3.71664	0.000201889	0.0266037	zmp-4 is an ortholog of human MMP21 (matrix metallopeptidase 21); zmp-4 is predicted to have metalloendopeptidase activity and zinc ion binding activity, based on protein domain information.
WBGene00012668	Y39B6A.5	51.275	0.474542	0.157709	3.00897	0.00262134	0.186241
WBGene00008841	F15A4.6	39.9291	0.474529	0.121495	3.90574	9.39359e-05	0.0156195
WBGene00011190	swt-6	82.8612	0.473611	0.148467	3.19001	0.00142266	0.118611
WBGene00021517	Y41D4B.15	16.7568	0.472894	0.125794	3.75927	0.000170412	0.0238009
WBGene00010440	ttr-51	144.468	0.472295	0.146947	3.21406	0.00130873	0.114356
WBGene00003408	mrp-2	386.571	0.471615	0.156325	3.0169	0.00255376	0.182231	This gene encodes a protein predicted by Eisenberg and coworkers, with 52% accuracy, to be mitochondrial.
WBGene00015271	C01B4.7	38.2456	0.471499	0.159789	2.95076	0.0031699	0.214025
WBGene00016094	C25E10.4	15.5024	0.468774	0.156494	2.99548	0.00274017	0.192176
WBGene00019478	cri-2	256.643	0.467444	0.165318	2.82755	0.00469059	0.275122	K07C11.5 is orthologous to the human gene SIMILAR TO TISSUE INHIBITOR OF METALLOPROTEINASE 3 (SORSBY FUNDUS DYSTROPHY, PSEUDOINFLAMMATORY) (TIMP3; OMIM:188826), which when mutated leads to disease.
WBGene00003588	nex-1	2300.27	0.467043	0.137173	3.40477	0.000662193	0.0698122	nex-1 encodes an annexin, a member of a family of calcium-dependent phospholipid binding proteins; NEX-1 is required for efficient engulfment of apoptotic cell corpses in the pharynx, and may also function in other membrane fusion events, such as exocytosis; NEX-1 in vitro can bind phosphatidylserine, phosphatidylinositol, heparin, heparan sulfate, and chondroitin sulfate; NEX-1 is expressed in t…
WBGene00017504	F16B4.2	26.3146	0.466847	0.16581	2.81555	0.00486938	0.284181	The F-box motif consists of roughly 50 amino acids. There are at least 11 F-box genes encoded by the genome of budding yeast, 22 in Drosophila, and 38 in human beings; but a striking 326 F-box genes are predicted to exist in C. elegans, comprising 1.6% of the protein-coding genome. This disproportionate number of F-box genes is paralleled by the number of Skp-1 homologs (which are potential F-box…
WBGene00009649	F43C1.5	32.199	0.465908	0.162038	2.8753	0.00403639	0.249701
WBGene00019931	R07C12.1	73.7353	0.465581	0.168231	2.76752	0.00564851	0.319385
WBGene00011252	R11H6.4	24.4008	0.46517	0.127788	3.64017	0.000272457	0.0347829
WBGene00018480	otpl-7	15.2905	0.465107	0.121211	3.83716	0.000124466	0.0183235	otpl-7 encodes an ortholog of otopetrins such as human OTOP1 (OMIM:607806), OTOP2 (OMIM:607827), and OTOP3 (OMIM:607828), along with other homologs in fish and insects (such as crustacean OTOPLb); otopetrins are predicted to have 12 transmembrane helices; by homology with OTOP1 and OTOPLb, OTPL-7 might regulate intracellular calcium fluxes during extracellular stimuli, promote extracellular calci…
WBGene00018707	oac-31	21.4075	0.464913	0.136829	3.39777	0.000679367	0.0708699
WBGene00018755	bcmo-2	22.8491	0.464466	0.140527	3.30517	0.000949186	0.0907056
WBGene00044901	Y41G9A.10	63.0707	0.463036	0.156794	2.95315	0.00314545	0.214025
WBGene00009620	fip-5	49.2398	0.461386	0.136722	3.37463	0.00073916	0.0754913
WBGene00021979	Y58A7A.5	63.5232	0.457572	0.166331	2.75098	0.00594174	0.325819
WBGene00022847	ZK1055.6	205.717	0.457347	0.1551	2.94873	0.00319085	0.214025
WBGene00007440	C08E8.4	44.1091	0.455344	0.133413	3.41304	0.000642434	0.0690659
WBGene00007153	clec-41	355.355	0.454991	0.148631	3.06122	0.00220439	0.163736
WBGene00194708	Y36E3A.2	14.7433	0.453254	0.141289	3.208	0.00133663	0.114356
WBGene00010660	K08D8.6	488.178	0.449573	0.14866	3.02416	0.00249324	0.17948
WBGene00019101	F59B1.10	49.7021	0.448844	0.168306	2.66683	0.00765705	0.384996
WBGene00014188	ZK1025.8	45.6758	0.447993	0.131413	3.40904	0.000651922	0.0696278
WBGene00004358	rhr-1	167.615	0.447406	0.167588	2.66967	0.00759247	0.383929	rhr-1 encodes an ortholog of human Rhesus blood-group associated glycoprotein (RHAG; OMIM:180297, mutated in chronic hemolytic anemia), a member of the ammonium transporter family, and affects general levels of mRNA transcripts, and embryonic viability in a large-scale RNAi screen.
WBGene00009957	F53B2.8	166.451	0.447138	0.152787	2.92655	0.00342744	0.222253
WBGene00019914	clec-150	96.5478	0.445641	0.147504	3.02121	0.00251769	0.180445
WBGene00003768	nlp-30	144.125	0.4456	0.161875	2.75274	0.00590991	0.325819	nlp-30 encodes five predicted neuropeptide-like proteins; in C. elegans, nlp-30 is part of the YGGWamide neuropeptide family that also contains nlp-24, nlp-25, and nlp-27-32; nlp-30 is expressed in the hypodermis, suggesting that the peptides it encodes may have a non-neuronal function; as loss of nlp-30 activity via large-scale RNAi screens does not result in any obvious abnormalities, the preci…
WBGene00007890	C33A12.19	36.0507	0.443831	0.148636	2.98603	0.00282621	0.197364
WBGene00018492	hpo-26	41.027	0.443434	0.125688	3.52806	0.000418622	0.0495703	RNA sequencing studies indicate that hpo-26 is enriched in the AFD and PLM neurons.
WBGene00000841	cul-6	78.1233	0.442799	0.160355	2.76136	0.00575609	0.322426	cul-6 encodes a member of the cullin family that may physically interact with SKR-3.
WBGene00002270	lec-7	18.3281	0.441723	0.126387	3.49499	0.000474071	0.0549418
WBGene00015278	C01B10.3	62.491	0.441501	0.154482	2.85794	0.00426398	0.258065	C01B10.3 encodes a paralog of IPP-5, and thus may functionally overlap with ipp-5 in vivo.
WBGene00010977	R02D5.3	96.8257	0.441065	0.137428	3.20943	0.00132999	0.114356
WBGene00009097	fipr-2	29.4781	0.440833	0.135908	3.24361	0.00118025	0.106555
WBGene00015048	faah-2	320.072	0.440476	0.162106	2.7172	0.0065836	0.350432
WBGene00010848	M04B2.6	87.2169	0.439369	0.15059	2.91764	0.00352693	0.226014	M04B2.6 encodes a novel protein conserved amongst nematodes; about 30% to 50% of M04B2.6 transcripts are RNA edited to change A to G resulting in a change to residue 89 from an N to a S.
WBGene00007361	oac-3	17.492	0.438646	0.149796	2.92829	0.00340828	0.222253
WBGene00007177	oac-1	12.773	0.43839	0.117665	3.72574	0.000194744	0.0262799
WBGene00194928	ZC513.14	15.1931	0.436276	0.137532	3.17218	0.00151297	0.124866
WBGene00012583	clec-4	78.0617	0.4349	0.155052	2.80486	0.00503382	0.290663	clec-4 encodes a C-type lectin; clec-4 expression is upregulated in response to stressors, including pathogens and ionizing radiation.
WBGene00004004	pgp-10	355.227	0.434726	0.140698	3.08977	0.00200309	0.15513	pgp-10 encodes an ATP-binding protein that is a member of the P-glycoprotein subclass of the ATP-binding cassette (ABC) transporter superfamily; PGP-10 is predicted to function as a transmembrane protein that couples energy to transport of various molecules across membranes, but as loss of pgp-10 activity via RNAi results in no obvious defects, the exact role of pgp-10 in C. elegans development a…
WBGene00012704	mlt-3	287.062	0.433625	0.166867	2.59863	0.00935976	0.439505
WBGene00206513	B0244.15	13.5219	0.432596	0.127341	3.39716	0.000680899	0.0708699
WBGene00020456	fbxa-60	29.4096	0.43215	0.136766	3.15978	0.00157891	0.129005	The F-box motif consists of roughly 50 amino acids. There are at least 11 F-box genes encoded by the genome of budding yeast, 22 in Drosophila, and 38 in human beings; but a striking 326 F-box genes are predicted to exist in C. elegans, comprising 1.6% of the protein-coding genome. This disproportionate number of F-box genes is paralleled by the number of Skp-1 homologs (which are potential F-box…
WBGene00001812	haf-2	878.236	0.431887	0.121538	3.55352	0.000380106	0.0467016	This gene encodes a protein predicted by Eisenberg and coworkers, with 52% accuracy, to be mitochondrial.
WBGene00020363	fbxa-3	23.3561	0.431498	0.162882	2.64915	0.00806947	0.397978	The F-box motif consists of roughly 50 amino acids. There are at least 11 F-box genes encoded by the genome of budding yeast, 22 in Drosophila, and 38 in human beings; but a striking 326 F-box genes are predicted to exist in C. elegans, comprising 1.6% of the protein-coding genome. This disproportionate number of F-box genes is paralleled by the number of Skp-1 homologs (which are potential F-box…
WBGene00044280	W02A2.9	386.712	0.431173	0.133311	3.23435	0.00121921	0.10887
WBGene00016066	acd-2	41.8682	0.428711	0.151392	2.83179	0.0046288	0.273066
WBGene00016914	C54D1.7	24.4435	0.428293	0.166183	2.57724	0.0099593	0.462344
WBGene00010491	K02B7.3	1393.72	0.427958	0.0886977	4.8249	1.40075e-06	0.00061864
WBGene00021079	W08A12.2	38.2148	0.4279	0.159665	2.67998	0.00736263	0.374806
WBGene00009896	scl-3	16.9886	0.424565	0.127591	3.32754	0.000876171	0.0860756	scl-3 encodes a predicted extracellular protein that is a member of the C. elegans family of SCP/TAPS domain-containing proteins.
WBGene00009432	cld-9	193.025	0.423637	0.146772	2.88636	0.00389729	0.244006
WBGene00021556	Y45G5AM.3	173.701	0.423043	0.151982	2.78351	0.00537743	0.306176
WBGene00008676	oac-15	23.2012	0.422954	0.134428	3.14632	0.00165341	0.13348
WBGene00000282	cah-4	339.096	0.422579	0.166764	2.53399	0.0112772	0.504877	cah-4 encodes a carbonic anhydrase homolog, which is rather divergent from other such homologs in C. elegans (with at most 38% identity to any other carbonic anhydrase, in or out of C. elegans); it is individually dispensable for viability and for grossly normal postembryonic morphology, and thus may have a more subtle biological function than the basic cytoprotective functions expected for carbo…
WBGene00009621	fipr-21	163.457	0.421125	0.159044	2.64785	0.00810056	0.397978
WBGene00018031	F35B3.4	227.127	0.420343	0.136874	3.07101	0.00213337	0.161395
WBGene00018732	F53A9.9	27.3005	0.417863	0.141914	2.94447	0.00323507	0.214025
WBGene00004157	pqn-75	114.658	0.417615	0.164535	2.53815	0.0111439	0.500869	Proteins bearing such domains can sometimes stably exist in at least two distinct physical states, each associated with a different phenotype; propagation of one of these traits is achieved by a self-perpetuating change in the protein from one form to the other, mediated by conformational changes in the glutamine/asparagine-rich domain. Prion domains are both modular and transferable to other pro…
WBGene00003554	nas-38	279.632	0.415874	0.146425	2.84018	0.00450885	0.269887	nas-38 encodes an astacin-like metalloprotease; loss of nas-38 activity via RNAi in an rrf-3 mutant background results in an extended life span.
WBGene00021121	W09G12.7	20.0146	0.415587	0.130495	3.18469	0.00144907	0.1202
WBGene00002271	lec-8	255.541	0.414997	0.166893	2.48661	0.0128968	0.565003	lec-8 encodes a glycolipid-binding galectin; LEC-8 binds glycolipids and can inhibit Bacillus thuringiensis Cry5B from binding glycolipids; lec-8 mutants are more susceptible to Cry5B; lec-8 is expressed in the pharyngeal-intestinal valve, the intestinal-rectal valve, and in some vesicles of the intestine; lec-8 expression in the intestine is induced in response to bacterial infection and Cry5B, …
WBGene00017338	F10D7.1	21.6149	0.413786	0.156021	2.65213	0.00799869	0.397978
WBGene00008199	C49C3.9	90.2498	0.413634	0.167456	2.4701	0.0135073	0.585473
WBGene00010001	F53F8.4	84.6782	0.41195	0.139873	2.94518	0.00322768	0.214025
WBGene00007660	pals-6	17.3732	0.411787	0.142636	2.88698	0.0038896	0.244006
WBGene00012005	jun-1	1066.75	0.409802	0.169153	2.42267	0.015407	0.638999	jun-1 encodes a basic-leucine zipper (bZIP) transcription factor that is the C. elegans JUN homolog; jun-1 activity is essential for regulation of ovulation, and thus normal levels of fertility; in regulating ovulation, JUN-1 functions with FOS-1 to regulate expression of plc-1 which encodes a phospholipase C essential for IP3 production and ovulation; in addition, JUN-1 interacts with FOS-1 in v…
WBGene00002087	ins-4	10.7009	0.409005	0.115592	3.53835	0.000402631	0.0483778	ins-4 encodes an insulin-like peptide.
WBGene00017034	otpl-2	17.6531	0.408504	0.131473	3.10712	0.00188917	0.149135	otpl-2 encodes an ortholog of otopetrins such as human OTOP1 (OMIM:607806), OTOP2 (OMIM:607827), and OTOP3 (OMIM:607828), along with other homologs in fish and insects (such as crustacean OTOPLb); otopetrins are predicted to have 12 transmembrane helices; by homology with OTOP1 and OTOPLb, OTPL-2 might regulate intracellular calcium fluxes during extracellular stimuli, promote extracellular calci…
WBGene00014182	ZK1025.2	45.6539	0.407433	0.126972	3.20885	0.00133268	0.114356
WBGene00021134	W10G11.1	15.2132	0.406329	0.151586	2.68052	0.0073508	0.374806
WBGene00009624	cnc-8	67.451	0.40629	0.143158	2.83805	0.00453905	0.270324	cnc-8 encodes one of eleven C. elegans caenacin peptides.
WBGene00003529	nas-10	30.1809	0.405845	0.114359	3.54887	0.000386888	0.0471801	nas-10 encodes an astacin-like metalloprotease.
WBGene00012573	Y37H2C.1	29.2542	0.404781	0.158228	2.55822	0.0105208	0.482924
WBGene00006628	tsp-2	83.9797	0.404725	0.164575	2.45921	0.0139242	0.594088
WBGene00018865	F55A12.6	7.08888	0.404054	0.116393	3.47146	0.000517629	0.0583596
WBGene00011817	T16H12.9	14.531	0.403311	0.151483	2.66241	0.00775832	0.388892
WBGene00007453	fbxa-98	14.6015	0.401757	0.13799	2.9115	0.00359695	0.2296	The F-box motif consists of roughly 50 amino acids. There are at least 11 F-box genes encoded by the genome of budding yeast, 22 in Drosophila, and 38 in human beings; but a striking 326 F-box genes are predicted to exist in C. elegans, comprising 1.6% of the protein-coding genome. This disproportionate number of F-box genes is paralleled by the number of Skp-1 homologs (which are potential F-box…
WBGene00019279	K01A2.4	356.825	0.400686	0.163553	2.44989	0.0142901	0.604958
WBGene00016097	C25E10.8	19.9313	0.40036	0.134673	2.97283	0.00295071	0.20345	C25E10.8 encodes a putative secreted TIL-domain protease inhibitor paralogous to SWM-1, ISL-1, and the products of 11 other C. elegans genes; C25E10.8 and its relatives are collectively similar to other TIL-domain protease inhibitors from nematodes, insects, and vertebrates; despite both swm-1 and C25E10.8 being mutated by the swm-1(ok1193) deletion, transgenic rescue of swm-1(ok1193) by SWM-1 al…
WBGene00003090	lys-1	780.545	0.399698	0.159263	2.50968	0.012084	0.536153	LYS-1 expression is reduced by dbl-1(RNAi), tir-1(RNAi), and nsy-1(RNAi), or by mutations of these three genes, but not by daf-16(RNAi) or daf-16(mu86).
WBGene00003530	nas-11	80.3199	0.399388	0.135544	2.94655	0.00321346	0.214025	nas-11 encodes an astacin-like metalloprotease; loss of nas-11 activity via RNAi has been reported to result in slow growth; large-scale expression studies reveal that a nas-11::GFP promoter fusion is expressed in the hypodermis and the nervous system.
WBGene00003960	pcs-1	427.901	0.397865	0.146741	2.71133	0.00670136	0.355323
WBGene00003589	nex-2	1880.43	0.39777	0.14605	2.72351	0.00645924	0.34677	nex-2 encodes an annexin, a member of a family of calcium-dependent phospholipid binding proteins; by homology, NEX-2 could function in a number of processes, such as membrane fusion, cytoskeletal interactions, and intracellular signaling; however, as loss of nex-2 function via RNA-mediated interference (RNAi) does not result in any abnormalities, the precise role of NEX-2 in C. elegans developme…
WBGene00001955	hlh-11	128.814	0.397204	0.168223	2.36118	0.018217	0.718595
WBGene00022382	Y94H6A.10	250.507	0.395942	0.146185	2.70849	0.00675897	0.355323
WBGene00018771	duox-2	21.4084	0.395911	0.154826	2.55713	0.0105539	0.483084	Joint inactivation of duox-2 and its close paralog bli-3 (F56C11.1) caused blistered and dumpy phenotypes reminiscent of those seen for collagen mutations, along with abnormally clear bodies, defective egg-laying, and strong paralysis; in electron micrographs of [bli-3 + duox-2](RNAi) animals, the fine structure of the cuticle is grossly defective. Moroever, dityrosine and trityrosine are absent …
WBGene00011042	R05H10.1	14.8482	0.39582	0.127977	3.09289	0.00198218	0.15447
WBGene00016894	C53B7.3	171.081	0.39551	0.132989	2.974	0.00293943	0.20345
WBGene00008681	scrm-4	117.799	0.393816	0.168583	2.33603	0.0194895	0.749362	Even multiple scrm-4(tm624) scrm-2(tm650); scrm-3(tm631) mutants have no obvious phenotype, other than a subtle decrease in the amount of phosphatidylserine exposure in apoptotic germline cells. Scramblase is activated by a rise of intracellular calcium, and promotes the exposure of phosphatidylserine on the surface of cells undergoing activation, injury, or apoptosis. Exposure of phosphatidylser…
WBGene00019592	K09F6.9	111.771	0.393797	0.138791	2.83733	0.00454924	0.270324
WBGene00009971	F53C11.1	119.067	0.393137	0.134047	2.93283	0.00335886	0.22043
WBGene00017396	F12A10.7	12.8132	0.391923	0.118853	3.29754	0.00097535	0.092664
WBGene00206354	F27E5.9	25.491	0.389944	0.163175	2.38973	0.0168607	0.678621
WBGene00017258	F08F1.4	6.37409	0.389713	0.111019	3.51033	0.000447556	0.0526152
WBGene00009102	F25B3.5	70.4695	0.387275	0.1613	2.40096	0.0163521	0.664702
WBGene00015332	tyr-1	71.6659	0.386132	0.142486	2.70996	0.00672913	0.355323	C02C2.1 encodes a tyrosinase homolog with a glutamine/asparagine-rich domain.
WBGene00019314	K02E7.10	14.6255	0.38586	0.150652	2.56126	0.0104294	0.480074
WBGene00007071	AC3.5	38.8785	0.385656	0.134192	2.8739	0.00405434	0.249701
WBGene00013013	clec-145	6.04757	0.385575	0.110621	3.48554	0.000491146	0.0565198
WBGene00003766	nlp-28	7.59646	0.385044	0.119884	3.21181	0.001319	0.114356	nlp-28 encodes a neuropeptide-like protein.
WBGene00008234	C50F4.9	38.5884	0.384776	0.167589	2.29595	0.0216788	0.810648
WBGene00004119	pqn-31	29.9325	0.3841	0.115826	3.31618	0.00091258	0.0882395	The protein product of this gene is predicted to contain a glutamine/asparagine (Q/N)-rich ('prion') domain, by the algorithm of Michelitsch and Weissman
WBGene00003762	nlp-24	422.405	0.383622	0.148979	2.57501	0.0100237	0.464014
WBGene00017726	F22H10.2	25.8417	0.381997	0.11217	3.40552	0.000660376	0.0698122
WBGene00008628	ttr-21	49.5355	0.379858	0.120763	3.14547	0.00165819	0.13348
WBGene00017510	nhr-178	21.2747	0.378766	0.154765	2.44736	0.0143909	0.607652
WBGene00018874	tag-234	85.8587	0.378739	0.143937	2.63128	0.00850643	0.412473
WBGene00077704	F12A10.9	22.2596	0.377266	0.115587	3.2639	0.00109888	0.101451
WBGene00016596	C42D4.3	1316.58	0.376956	0.117056	3.22031	0.00128052	0.113108
WBGene00013119	Y51H4A.25	55.4417	0.376412	0.158926	2.36847	0.0178616	0.707436
WBGene00016180	C28C12.4	22.9083	0.376123	0.123859	3.03669	0.00239189	0.173715
WBGene00017577	F18F11.4	45.2739	0.375974	0.144852	2.59558	0.00944322	0.442154
WBGene00016003	C18H9.5	21.0918	0.375143	0.141738	2.64673	0.00812732	0.397978
WBGene00003096	lys-7	20.0251	0.375027	0.130505	2.87367	0.0040573	0.249701	lys-7 encodes an enzyme homologous to an antimicrobial lysozyme encoded by the LYS4 gene of the protozoan parasite Entamoeba histolytica; LYS-7 functions in the innate immune response as an antimicrobial enzyme that, by homology, hydrolyzes the 1,4-beta-linkages between N-acetyl-D-glucosamine and N-acetylmuramic acid in peptidoglycan heteropolymers of prokaryotic cell walls; loss of lys-7 activit…
WBGene00021219	Y19D10A.4	28.129	0.374459	0.139396	2.68629	0.00722499	0.371269
WBGene00007437	C08E8.1	8.1061	0.374282	0.112341	3.33165	0.000863327	0.0855008
WBGene00020912	W01A11.7	71.4845	0.372941	0.167587	2.22535	0.0260575	0.921658
WBGene00016119	C25H3.10	64.5686	0.371948	0.122807	3.0287	0.00245605	0.177586
WBGene00016407	C34D10.2	151.182	0.370864	0.162961	2.27578	0.0228591	0.841472
WBGene00021081	pals-33	8.71538	0.370312	0.113159	3.27248	0.00106608	0.0989823
WBGene00019858	R03H10.6	55.3527	0.369008	0.167523	2.20273	0.0276137	0.956008
WBGene00015993	C18H7.1	74.391	0.368883	0.129754	2.84295	0.00446976	0.268531
WBGene00009431	dct-17	19.3162	0.368494	0.135299	2.72356	0.00645821	0.34677
WBGene00015225	B0507.8	17.723	0.368055	0.128472	2.86486	0.00417189	0.254376
WBGene00019780	M60.4	479.103	0.366822	0.164166	2.23446	0.0254528	0.91012
WBGene00020049	ttr-8	31.0949	0.366646	0.122941	2.9823	0.00286089	0.198935	R13A5.6 encodes a protein containing a predicted signal sequence followed by a transthyretin-like domain; the product of R13A5.6 belongs to a family of apparently nematode-specific proteins whose function is not yet known; an R13A5.6::GFP promoter fusion directs expression outside of the nervous system.
WBGene00010251	sta-2	439.189	0.365964	0.166223	2.20165	0.0276902	0.956629	sta-2 encodes a member of the STAT family of transcription factors; STA-2 functions cell autonomously together with the SNF-12 sodium-dependent neurotransmitter symporter to regulate expression of antimicrobial peptides in the epidermis following fungal infection and physical wounding; STA-2 physically interacts with SNF-12; a sta-2 reporter gene is expressed in the epidermis throughout developme…
WBGene00002021	hsp-17	91.6548	0.364462	0.15795	2.30746	0.0210293	0.789975	hsp-17 encodes a heat shock protein that is a member of the hsp16/hsp20/alpha-crystallin family of heat shock proteins; by homology, HSP-17 is predicted to function as a molecular chaperone that protects cells from heat-induced protein aggregation and denaturation.
WBGene00000017	abf-6	23.6104	0.364033	0.139835	2.60331	0.00923297	0.436058	The protein product of this gene is predicted to contain a glutamine/asparagine (Q/N)-rich ('prion') domain, by the algorithm of Michelitsch and Weissman (as of the WS77 release of WormBase, i.e., in wormpep77). Proteins bearing such domains can sometimes stably exist in at least two distinct physical states, each associated with a different phenotype; propagation of one of these traits is achiev…
WBGene00007932	zip-5	135.741	0.363662	0.160982	2.25902	0.0238821	0.869169	zip-5 encodes a bZip transcription factor; a zip-5::gfp promoter reporter gene fusion is expressed primarily in the nervous system, with mid- and late-stage embryos showing strong expression in head neurons, while larvae show expression in the ventral nerve cord and head and tail neurons; adults also show GFP expression in head muscles and intermittently in the intestine.
WBGene00014006	ZK596.1	32.8623	0.363325	0.118453	3.06724	0.00216046	0.162427
WBGene00016530	C39D10.2	35.895	0.362655	0.165496	2.19132	0.0284287	0.973447
WBGene00009842	igeg-2	75.9688	0.362358	0.154902	2.33928	0.019321	0.748164
WBGene00020339	ttr-59	241.441	0.362186	0.167886	2.15734	0.0309793	0.999955
WBGene00001577	gem-4	1452.2	0.361626	0.122199	2.95932	0.00308317	0.211689	All copines have two 130-residue C2 domains in the N-terminal half of the protein; C2 domains are found in many different proteins and typically mediate binding to Ca[2+]; and the C-terminal half of copine proteins contains an A domain of 200 aa that has similarity to the Mg[2+]-binding domain of integrins. Mutations in gem-4 suppress loss-of-function alleles of gon-2, but not alleles of gon-4, i…
WBGene00019593	K09F6.10	80.8786	0.361377	0.138749	2.60455	0.0091996	0.436058
WBGene00004009	pgp-15	33.5944	0.361299	0.168709	2.14155	0.0322298	0.999955	pgp-15 encodes an ATP-binding protein that is a member of the P-glycoprotein subclass of the ATP-binding cassette (ABC) transporter superfamily; PGP-15 is predicted to function as a transmembrane protein that couples energy to transport of various molecules across membranes, but as loss of pgp-15 activity via large-scale RNAi screens does not result in any obvious defects, the precise role of pgp…
WBGene00017226	fbxa-53	34.2071	0.361197	0.151074	2.39086	0.0168091	0.678218
WBGene00019090	F59A7.2	15.5042	0.360939	0.115001	3.13858	0.0016977	0.135991
WBGene00020720	T23B12.5	32.2948	0.359709	0.151625	2.37236	0.017675	0.70618
WBGene00011262	pho-8	21.3435	0.359399	0.151681	2.36944	0.0178149	0.707436
WBGene00045411	C25F9.11	87.418	0.355695	0.151068	2.35454	0.0185456	0.726746
WBGene00044169	C06C3.10	98.6675	0.355373	0.16714	2.12619	0.0334871	0.999955
WBGene00003605	nhr-6	117.708	0.354982	0.160719	2.20871	0.0271947	0.949453	nhr-6 encodes a nuclear receptor of the NR4A subfamily that is orthologous to the mammalian NGFI-B receptors and the Drosophila HR38 nuclear receptor (DHR38) that has been implicated in molting and metamorphosis; nhr-6 activity is required for spermatheca development and thus, for regulation of ovulation and fertilization; a GST-NHR-6 fusion protein can bind the canonical vertebrate NR4A binding …
WBGene00009947	ttc-36	291.773	0.354448	0.125121	2.83285	0.00461356	0.273066
WBGene00021253	Y22D7AL.15	98.5897	0.353516	0.140899	2.50901	0.012107	0.536153
WBGene00015857	C16D9.1	89.731	0.353291	0.143561	2.46091	0.0138584	0.594088
WBGene00077525	C41G7.8	19.1605	0.353281	0.126614	2.79023	0.005267	0.301993
WBGene00044385	F59A6.10	76.7099	0.352376	0.121147	2.90866	0.00362983	0.230798
WBGene00022644	dod-19	834.572	0.352026	0.119088	2.956	0.00311654	0.213085	dod-19 is involved in innate immune response[HEP].
WBGene00002117	ins-34	717.732	0.351669	0.116935	3.00739	0.00263503	0.186403	ins-34 encodes an insulin-like peptide.
WBGene00015080	B0244.5	24.1126	0.351215	0.132763	2.64543	0.00815877	0.397978
WBGene00019770	M04F3.4	1253.77	0.350698	0.0974938	3.59713	0.000321744	0.0404432
WBGene00014836	T09F5.12	464.144	0.35057	0.1298	2.70086	0.00691614	0.357648
WBGene00003055	lon-1	55.8243	0.350503	0.165659	2.11582	0.0343604	0.999955	PR-proteins are found in yeast, plants, insects, and humans. The lon-1 gene is downregulated in worms overexpressing DBL-1 that are 16% longer than wild type; lon-1(RNAi) or lon-1 mutant worms show a phenotype similar to that of excess DBL-1. Endoreduplication of hypodermal nuclei is increased 19% in lon-1(e185) animals. PR-proteins are found in yeast, plants, insects, and humans; the conservatio…
WBGene00001730	grl-21	504.208	0.350099	0.109322	3.20246	0.00136259	0.115368	grl-21 encodes a hedgehog-like protein, with an N-terminal signal sequence, a central proline-rich low-complexity region, and a C-terminal Ground-like (Grl) domain; GRL-21 is expressed in arcade cells and hypodermis; the Grl domain is predicted to form a cysteine-crosslinked protein involved in intercellular signalling, and it has subtle similarity to the N-terminal Hedge domain of HEDGEHOG prote…
WBGene00016717	math-22	28.0944	0.349488	0.130253	2.68314	0.00729345	0.373612
WBGene00017764	F25A2.1	5.10315	0.348542	0.106368	3.27676	0.00105004	0.0980495
WBGene00019058	F58F9.4	22.1252	0.348038	0.142665	2.43955	0.0147055	0.617743
WBGene00014194	ZK1037.6	33.8325	0.345379	0.112453	3.07131	0.00213118	0.161395
WBGene00014135	ZK896.4	26.8362	0.343917	0.137345	2.50404	0.0122784	0.542273
WBGene00004811	skr-5	13.6216	0.343801	0.113063	3.04079	0.0023596	0.172135	SKR-5 may, like Skp1p, function within a particular SCF ubiquitin-ligase (E3) complex by binding both a cullin (a homolog of S. cerevisiae Cdc53) and an F box protein (through direct interaction with an F box motif). However, Skp1p also can associate with other proteins besides SCF components, so the function of SKR-5 is not necessarily confined to, or even partially involved with, C. elegans ubi…
WBGene00018251	F40H3.3	174.454	0.34343	0.162507	2.11332	0.0345731	0.999955
WBGene00006470	tag-120	289.728	0.343196	0.152205	2.25483	0.0241439	0.874775	tag-120 encodes a predicted transmembrane protein; as loss of tag-120 activity via RNAi does not result in any abnormalities, the precise role of TAG-120 in C. elegans development and/or behavior is not yet known; however, TAG-120 is homologous to a Drosophila NMDA receptor-associated protein and mammalian transmembrane proteins that function in Fas-mediated cell death, so TAG-120 may play a role…
WBGene00008392	D1086.5	12.6992	0.342611	0.124513	2.75161	0.0059303	0.325819
WBGene00015216	valv-1	298.83	0.3426	0.165022	2.07609	0.0378856	0.999955	valv-1 encodes one of two C. elegans small LIM domain-containing proteins related to the mammalian CRIP (Cysteine-Rich Intestinal Protein) family of proteins; in C. elegans, valv-1 activity is required for normal functioning of the valves connecting the pharynx to the intestine, the intestine to the rectum, and the uterus to the spermatheca; a valv-1::gfp promoter fusion is expressed in the phary…
WBGene00017361	F10E9.12	10.2734	0.341719	0.121592	2.81037	0.00494839	0.287764
WBGene00018538	marg-1	18.9871	0.341255	0.115813	2.9466	0.0032129	0.214025	F47B7.7 encodes a novel protein conserved amongst nematode species.
WBGene00008777	F13H10.6	351.992	0.340474	0.163968	2.07646	0.0378511	0.999955
WBGene00009380	F34H10.3	691.428	0.338539	0.162459	2.08383	0.0371752	0.999955
WBGene00011672	cyp-13A5	32.43	0.33828	0.124238	2.72284	0.00647237	0.34677	cyp-13A5 encodes one of ~80 C. elegans cytochrome P450s: membrane-associated, heme-containing NADPH-dependent monooxygenases that catalyze the oxidative metabolism of a variety of exogenous compounds and endogenous substrates; loss of cyp-13A5 activity in large-scale RNAi screens results in uncoordinated locomotion, decreased and/or slow growth, and cadmium hypersensitivity.
WBGene00009963	fipr-26	17.705	0.337779	0.123231	2.74103	0.00612473	0.332506
WBGene00020613	T20D4.7	4.21198	0.337322	0.105207	3.20626	0.00134471	0.114448
WBGene00014148	ZK909.3	791.351	0.33708	0.165128	2.04133	0.0412176	0.999955
WBGene00018427	F44E7.5	521.758	0.33663	0.168826	1.99395	0.0461572	0.999955
WBGene00007216	C01A2.4	757.643	0.333964	0.108385	3.08126	0.00206126	0.158136
WBGene00006980	zig-3	47.2506	0.332968	0.161563	2.06092	0.0393108	0.999955	zig-3 encodes a predicted secreted protein that is a member of the immunoglobulin superfamily of proteins; a zig-3::gfp reporter fusion is expressed in the PVT, AIM, and ASI neurons, as well as in the vulva and weakly in the body wall muscle.
WBGene00016111	C25H3.1	6.43237	0.332201	0.103993	3.19446	0.00140093	0.118003
WBGene00194713	F19B10.13	15.8309	0.331701	0.126134	2.62975	0.00854473	0.413105
WBGene00020248	T05C1.1	119.193	0.331087	0.159619	2.07424	0.0380573	0.999955
WBGene00008577	F08G2.5	45.9996	0.330641	0.148408	2.22793	0.0258854	0.919863
WBGene00020714	T23B3.6	14.0097	0.330276	0.158347	2.08577	0.0369991	0.999955
WBGene00018259	F41B4.3	110.989	0.329841	0.144477	2.28299	0.0224307	0.831158
WBGene00015805	C15H9.11	119.944	0.329594	0.163429	2.01674	0.0437227	0.999955
WBGene00015169	B0403.5	555.617	0.32949	0.151712	2.17181	0.02987	0.999955
WBGene00017865	F27D9.7	62.5979	0.329348	0.150628	2.1865	0.0287794	0.981803
WBGene00009077	F23B2.10	13.0292	0.328245	0.159196	2.0619	0.0392174	0.999955
WBGene00016301	fbxc-6	8.05985	0.327203	0.127427	2.56776	0.0102357	0.472492
WBGene00012910	Y46G5A.20	14.9671	0.326535	0.135857	2.40352	0.016238	0.66171
WBGene00015823	C16B8.3	225.725	0.325747	0.149272	2.18223	0.0290923	0.988353
WBGene00011286	ttr-29	14.2111	0.325384	0.112501	2.89227	0.00382466	0.241308
WBGene00004226	ptr-12	109.834	0.32434	0.158823	2.04214	0.0411376	0.999955	ptr-12 encodes a nematode-specific member of the sterol sensing domain (SSD) proteins, distantly paralogous to Drosophila PATCHED (PTC) and human PTCH (OMIM:601309, mutated in basal cell nevus syndrome); PTR-12 is weakly required for normal molting from L4 to adult stages growth to full size; PTR-12 is also required for normal locomotion.
WBGene00045457	F33H12.7	13.0027	0.323331	0.106266	3.04267	0.00234492	0.171831
WBGene00007989	fipr-22	19.0545	0.323323	0.16258	1.9887	0.046734	0.999955
WBGene00016659	C45B2.2	384.328	0.323304	0.112558	2.87234	0.00407445	0.249701
WBGene00008486	ugt-44	101.315	0.323116	0.139467	2.31679	0.0205149	0.777806
WBGene00017126	E04F6.6	104.141	0.322911	0.163154	1.97918	0.0477963	0.999955
WBGene00021543	Y43B11AR.1	242.55	0.322323	0.161528	1.99546	0.0459922	0.999955
WBGene00006674	twk-21	10.3311	0.322056	0.156169	2.06223	0.0391857	0.999955
WBGene00023423	F43C1.7	7.66575	0.321949	0.121487	2.65007	0.00804751	0.397978
WBGene00012783	Y43C5A.3	12.298	0.321087	0.105153	3.05353	0.00226164	0.167228
WBGene00001496	frm-10	1008.28	0.319537	0.145862	2.19068	0.0284749	0.973447	frm-10 encodes a protein that contains an N-terminal FERM (Band 4.1-ezrin-radixin-moesin) domain; by homology, FRM-10 is predicted to function as a membrane-cytoskeleton linker protein that plays a role in cell adhesion, migration, or organization of cell surface structures; however, as loss of frm-10 activity via large-scale RNAi screens does not result in any obvious abnormalities, the precise …
WBGene00016450	clec-5	204.185	0.317813	0.140066	2.26902	0.0232672	0.85058
WBGene00013845	fbxa-37	78.9479	0.317001	0.157273	2.01561	0.043841	0.999955	The F-box motif consists of roughly 50 amino acids. There are at least 11 F-box genes encoded by the genome of budding yeast, 22 in Drosophila, and 38 in human beings; but a striking 326 F-box genes are predicted to exist in C. elegans, comprising 1.6% of the protein-coding genome. This disproportionate number of F-box genes is paralleled by the number of Skp-1 homologs (which are potential F-box…
WBGene00010124	F55G11.4	12.0853	0.316758	0.138283	2.29065	0.0219836	0.818302	F55G11.4 encodes a protein containing a CUB-like domain conserved amongst nematodes; F55G11.4 expression is increased in response to bacterial infection, suggesting that it plays a role in the defense response.
WBGene00006650	tts-1	223.209	0.315439	0.154944	2.03583	0.0417675	0.999955
WBGene00015382	C03B1.14	17.3393	0.313117	0.144437	2.16785	0.0301702	0.999955
WBGene00011586	flp-33	16.483	0.312186	0.142013	2.19829	0.0279283	0.962819
WBGene00000977	dhs-14	34.8155	0.311258	0.119068	2.61413	0.00894543	0.426173	dhs-14 encodes a short chain-type of alcohol/other dehydrogenase, more similar to 18 paralogs in C. elegans than to any non-worm protein; it is dispensable for viability and gross morphology in mass RNAi screens.
WBGene00010667	K08E4.3	310.12	0.31082	0.133626	2.32604	0.0200165	0.767818
WBGene00010749	K10D11.5	13.8133	0.310619	0.109872	2.82709	0.00469734	0.275122
WBGene00010005	cnc-7	6.4287	0.310149	0.107152	2.89448	0.00379786	0.240546	cnc-7 encodes one of eleven C. elegans caenacin peptides.
WBGene00016997	cebp-1	418.944	0.30997	0.151535	2.04553	0.0408027	0.999955	CEBP-1 and ZIP-4 are obvious homologs of Brugia malayi Bm1_32560.
WBGene00011657	T09E11.8	14.8458	0.309671	0.148713	2.08234	0.0373114	0.999955
WBGene00000016	abf-5	7.81136	0.309191	0.107565	2.87446	0.0040472	0.249701	At present the only evidence for its having an antimicrobial humoral function is its sequence similarity.
WBGene00022012	Y59H11AR.4	114.253	0.30911	0.153994	2.00729	0.0447183	0.999955
WBGene00045253	F46C3.6	46.3642	0.308729	0.126957	2.43176	0.0150256	0.629352
WBGene00044376	Y49F6B.12	8.45096	0.308619	0.112326	2.74754	0.00600449	0.327065
WBGene00013843	fbxa-49	5.61709	0.308003	0.116951	2.6336	0.00844844	0.410881	The F-box motif consists of roughly 50 amino acids. There are at least 11 F-box genes encoded by the genome of budding yeast, 22 in Drosophila, and 38 in human beings; but a striking 326 F-box genes are predicted to exist in C. elegans, comprising 1.6% of the protein-coding genome. This disproportionate number of F-box genes is paralleled by the number of Skp-1 homologs (which are potential F-box…
WBGene00000246	bcc-1	20.5706	0.307638	0.130804	2.3519	0.0186777	0.730172	The C. elegans genome encodes two Bicaudal C homologs: BCC-1, a more conserved homolog (in terms of domain architecture), and GLD-3, a more divergent protein that contains the KH RNA-binding domains but lacks the C-terminal SAM motif. Mouse BICC1 is mutated in the jcpk and bkp models of polycystic kidney disease.
WBGene00019146	H02F09.3	30.1028	0.306957	0.133291	2.30291	0.021284	0.797712
WBGene00003528	nas-9	10.898	0.306799	0.109267	2.80779	0.0049882	0.289051	nas-9 encodes an astacin-like metalloprotease; loss of nas-9 activity via RNAi results in low levels (6%) of embryonic lethality; a nas-9::GFP promoter fusion is expressed in embryos and in the hypodermis of larvae and adults.
WBGene00007807	C29F3.7	468.944	0.304653	0.142971	2.13088	0.0330992	0.999955	C29F3.7 encodes a CUB-like domain-containing protein; C29F3.7 is involved in the transcriptional, innate immune response towards several different bacterial pathogens.
WBGene00002274	lec-11	138.641	0.302074	0.143582	2.10383	0.035393	0.999955	lec-11 encodes a predicted member of the galectin family that shares highest similarity with lec-7 through lec-10 within the C-terminal tail and also shares a higher relative histidine content in common with lec-7 through lec-10; can bind sugar in vitro.
WBGene00022891	ZK1290.10	24.362	0.301259	0.119772	2.51528	0.0118937	0.529577
WBGene00011113	R07E5.5	10.9332	0.301096	0.122364	2.46066	0.0138683	0.594088
WBGene00017471	F14H12.3	31.6278	0.300706	0.107908	2.78669	0.00532498	0.30425
WBGene00021239	Y20F4.4	790.797	0.300501	0.135574	2.21651	0.0266564	0.940803
WBGene00007835	oac-7	5.39524	0.300471	0.104624	2.87191	0.00407993	0.249701
WBGene00008850	F15B9.6	20.3408	0.300399	0.12029	2.49728	0.012515	0.551235
WBGene00044788	ttr-38	17.564	0.299742	0.102604	2.92135	0.00348518	0.224515
WBGene00008454	E02A10.4	64.685	0.299332	0.123133	2.43096	0.0150589	0.629352
WBGene00044468	Y69A2AL.2	16.3781	0.2976	0.124139	2.39731	0.016516	0.66804
WBGene00044728	Y53F4B.45	355.656	0.297457	0.149574	1.98869	0.0467351	0.999955
WBGene00016845	C50F7.5	117.298	0.296056	0.100621	2.9423	0.00325788	0.214666
WBGene00005833	srw-86	22.0708	0.295024	0.141578	2.08382	0.0371761	0.999955
WBGene00016099	C25E10.10	18.0307	0.294997	0.132434	2.22751	0.0259133	0.919863	C25E10.10 encodes a putative secreted TIL-domain protease inhibitor paralogous to SWM-1, ISL-1, and the products of 11 other C. elegans genes; C25E10.10 and its relatives are collectively similar to other TIL-domain protease inhibitors from nematodes, insects, and vertebrates; C25E10.10 has no obvious function in mass RNAi assays.
WBGene00003092	lys-3	188.633	0.294978	0.100755	2.92768	0.00341506	0.222253	lys-3 encodes one of a family of ten C. elegans lysozyme genes that are homologous to lysozymes in the amoeboid protozoan Entamoeba histolytica; lys-3 expression is upregulated in response to stress; lys-3 activity is required for the stress response to copper ion, and in response to copper ion stress, lys-3 expression is upregulated in a kgb-1-dependent manner.
WBGene00013515	Y73F4A.2	67.2585	0.294675	0.139491	2.1125	0.0346434	0.999955
WBGene00001532	gcy-5	13.8037	0.291599	0.140881	2.06983	0.0384683	0.999955	gcy-5 encodes a predicted guanylate cyclase with strong similarity to rat atrial natriuretic peptide receptor A; expressed in ASER.
WBGene00012399	Y6E2A.5	6.78609	0.290526	0.103856	2.7974	0.00515156	0.296414
WBGene00044180	C47E8.11	11.1072	0.289282	0.138928	2.08225	0.0373201	0.999955
WBGene00271817	F55C12.19	26.6217	0.28838	0.141542	2.03742	0.0416084	0.999955
WBGene00003703	nhr-113	10.6372	0.288075	0.101278	2.84439	0.00444959	0.268305	nhr-113 encodes a nuclear receptor that is most highly conserved amongst nematode species.
WBGene00008797	F14D7.10	5.44596	0.285501	0.0977428	2.92094	0.0034898	0.224515
WBGene00008099	C44H9.4	9.41543	0.284645	0.126083	2.2576	0.0239703	0.870442
WBGene00235114	ZK105.13	17.9228	0.283976	0.103275	2.74971	0.00596485	0.325992
WBGene00011292	allo-1	3380.44	0.283718	0.114225	2.48385	0.0129972	0.567141	RNA sequencing and microarray studies indicate that allo-1 is enriched in the germ line and muscle cell and in the AFD neurons.
WBGene00018921	sago-2	373.364	0.282627	0.140274	2.01482	0.0439239	0.999955	sago-2 encodes an Argonaute homolog that is partially required for the amplification phase of RNAi responses; a multiply mutant strain (MAGO), consisting of ppw-1(tm914), sago-1(tm1195), sago-2(tm894), F58G1.1(tm1019), C06A1.4(tm887), and M03D4.6(tm1144) alleles, is completely resistant to both germline and somatic RNAi; sago-2 is genetically redundant with ppw-1 and sago-1, with any one of these…
WBGene00006191	str-144	15.0879	0.281957	0.12457	2.26343	0.0236089	0.861146
WBGene00019047	F58E2.3	14.3038	0.281437	0.127163	2.2132	0.0268836	0.946206	The F-box motif consists of roughly 50 amino acids. There are at least 11 F-box genes encoded by the genome of budding yeast, 22 in Drosophila, and 38 in human beings; but a striking 326 F-box genes are predicted to exist in C. elegans, comprising 1.6% of the protein-coding genome. This disproportionate number of F-box genes is paralleled by the number of Skp-1 homologs (which are potential F-box…
WBGene00013516	Y73F4A.3	16.1503	0.279605	0.105369	2.65357	0.00796455	0.397978
WBGene00006450	tag-77	1309.65	0.279063	0.101412	2.75178	0.00592722	0.325819	tag-77 is predicted to have Rho guanyl-nucleotide exchange factor activity and metal ion binding activity, based on protein domain information; tag-77 is expressed in the gon_herm_dtc_P, gon_herm_dtc_A, anchor cell, Z4, Z1, spermatheca, and the uterine toroidal epithelial cell.
WBGene00014125	ZK863.8	170.732	0.276805	0.14024	1.9738	0.0484041	0.999955
WBGene00007574	C14B1.3	360.312	0.27659	0.121828	2.27033	0.0231875	0.849567	The F-box motif consists of roughly 50 amino acids. There are at least 11 F-box genes encoded by the genome of budding yeast, 22 in Drosophila, and 38 in human beings; but a striking 326 F-box genes are predicted to exist in C. elegans, comprising 1.6% of the protein-coding genome. This disproportionate number of F-box genes is paralleled by the number of Skp-1 homologs (which are potential F-box…
WBGene00020047	ttr-32	45.2738	0.275755	0.11682	2.36051	0.0182496	0.718595	R13A5.3 encodes a protein containing a predicted signal sequence followed by a transthyretin-like domain; although the product of R13A5.3 belongs to a family of apparently nematode-specific proteins whose function is not yet known, loss of R13A5.3 activity via RNAi has been reported to result in hyperactive locomotion.
WBGene00077593	C49G7.12	5.12145	0.27462	0.103791	2.6459	0.00814745	0.397978
WBGene00016491	acdh-5	4.50497	0.274105	0.102707	2.6688	0.00761233	0.383929
WBGene00006649	tth-1	3429.39	0.273709	0.0994481	2.75228	0.00591812	0.325819	tth-1 encodes a thymosin beta ortholog that contains four functionally distinct thymosin beta repeats; in vitro, TTH-1 binds multiple actin monomers as well as filamentous actin suggesting that, as its homology predicts, TTH-1 plays a direct role in regulating actin polymerization and cytoskeletal organization in C. elegans; consistent with this, loss of tth-1 activity via a deletion mutation tha…
WBGene00007833	oac-6	23.6583	0.272012	0.110345	2.4651	0.0136974	0.592141
WBGene00045096	K01A6.7	13.3365	0.269971	0.116289	2.32155	0.020257	0.771606
WBGene00001534	gcy-7	11.966	0.269236	0.127487	2.11188	0.0346971	0.999955	gcy-7 encodes a membrane guanylyl cyclase; a gcy-7::gfp reporter is expressed asymmetrically in the ASEL sensory neuron.
WBGene00003573	ncx-8	5.22897	0.26905	0.10388	2.59002	0.00959708	0.448074	ncx-8 encodes a putative Na[+]/Ca[2+] exchanger of uncertain stoichiometry and affinity, orthologous to human SLC24A6 and paralogous to NCX-6/-7 and NCX-9/-10; NCX-8 may function intracellularly; NCX-8 has tandem Calx-alpha domains predicted to carry out ion transport; NCX-8 is required for normally high levels of body fat.
WBGene00010545	cbp-2	23.1832	0.267598	0.119228	2.24443	0.024805	0.890854
WBGene00009429	irg-5	20.8154	0.265767	0.10162	2.6153	0.00891498	0.426173
WBGene00016283	zmp-3	25.0037	0.26569	0.104603	2.53999	0.0110857	0.500417
WBGene00008794	F14D7.7	7.16316	0.26378	0.107861	2.44556	0.0144629	0.60912
WBGene00044012	srxa-19	4.68592	0.263453	0.106932	2.46375	0.0137493	0.592816
WBGene00006656	twk-1	21.5293	0.261878	0.105289	2.48722	0.0128744	0.565003
WBGene00022478	fbxa-35	3.2749	0.261161	0.0945876	2.76106	0.00576149	0.322426
WBGene00015640	C09E7.6	353.283	0.260198	0.120489	2.15952	0.03081	0.999955
WBGene00006575	tir-1	3954.42	0.258053	0.10897	2.3681	0.0178796	0.707436	tir-1 encodes a Toll-Interleukin 1 Receptor (TIR) domain adaptor protein that is the C. elegans ortholog of human SARM (sterile alpha and armadillo repeats); tir-1 is required for innate immunity, as loss of tir-1 activity results in increased susceptibility to infection; tir-1 also functions in a lateral signaling pathway that specifies neuronal identity and is required for proper localization o…
WBGene00009339	F32G8.3	8.84279	0.257366	0.113165	2.27426	0.0229504	0.84277
WBGene00045474	C49G9.2	4.67597	0.257268	0.0987871	2.60427	0.009207	0.436058
WBGene00011725	lips-5	6.85474	0.256146	0.115021	2.22695	0.0259505	0.919863
WBGene00009347	F32H5.1	7.97036	0.255332	0.12879	1.98255	0.0474182	0.999955
WBGene00044527	Y39H10B.2	8.78839	0.254575	0.12179	2.09028	0.0365929	0.999955
WBGene00013079	ttr-26	216.23	0.254562	0.096998	2.6244	0.00868013	0.418413
WBGene00013844	fbxa-50	2.97641	0.251651	0.0931668	2.70108	0.00691142	0.357648	The F-box motif consists of roughly 50 amino acids. There are at least 11 F-box genes encoded by the genome of budding yeast, 22 in Drosophila, and 38 in human beings; but a striking 326 F-box genes are predicted to exist in C. elegans, comprising 1.6% of the protein-coding genome. This disproportionate number of F-box genes is paralleled by the number of Skp-1 homologs (which are potential F-box…
WBGene00045415	Y43F8B.15	4.4812	0.250846	0.0926205	2.70832	0.00676247	0.355323
WBGene00194926	K08D8.12	5.59174	0.250639	0.107055	2.34121	0.0192213	0.74607
WBGene00021047	zfp-3	1595.92	0.250629	0.125705	1.99378	0.0461762	0.999955	zfp-3 is an ortholog of human ZC3H8 (zinc finger CCCH-type containing 8), ZC3H6 (zinc finger CCCH-type containing 6) and ZC3H4 (zinc finger CCCH-type containing 4); zfp-3 is predicted to have metal ion binding activity, based on protein domain information.
WBGene00004405	rop-1	932.769	0.250597	0.107912	2.32225	0.0202196	0.771606	rop-1 encodes an RNAi-binding protein that is orthologous to the vertebrate 60-kDa Ro autoantigen that is the protein component of the Ro ribonucleoprotein (RNP) complex; ROP-1 binds the single C. elegans Ro RNP RNA component, YRN-1 (Y RNA) in vivo and although loss of rop-1 activity via mutation results in no obvious visible phenotypes, it does result in a dramatic decrease in YRN-1 levels, indi…
WBGene00019265	H35N09.1	6.48196	0.250168	0.109722	2.28001	0.022607	0.835795
WBGene00019564	K09D9.1	149.636	0.249595	0.0980761	2.54491	0.0109306	0.496158
WBGene00009430	F35E12.6	13.9625	0.247502	0.10289	2.4055	0.0161505	0.661444
WBGene00019213	H20E11.1	18.3658	0.246027	0.102357	2.40362	0.0162335	0.66171
WBGene00021580	clec-174	7.91196	0.245195	0.0959933	2.5543	0.0106403	0.485679
WBGene00018209	F39G3.4	6.63223	0.243859	0.104337	2.33722	0.0194277	0.749362
WBGene00003185	mek-1	2208.65	0.243764	0.110431	2.20738	0.0272872	0.949453	mek-1 encodes a MAP kinase kinase (MAPKK) that is involved in the stress response to heavy metals and starvation, and that has the highest homology to mammalian MKK7.
WBGene00001713	grl-4	899.772	0.2353	0.118575	1.9844	0.047211	0.999955	grl-4 encodes a hedgehog-like protein, with an N-terminal signal sequence, a central proline-rich low-complexity region, and a C-terminal Ground-like (Grl) domain; GRL-4 is expressed in pharynx, reproductive system, vulva, larval neurons, and larval rectal epithelium; the Grl domain is predicted to form a cysteine-crosslinked protein involved in intercellular signalling, and it has subtle similar…
WBGene00017839	F26G1.3	4.48136	0.233703	0.0951482	2.4562	0.0140415	0.597532	F26G1.3 encodes a protein containing a transthyretin-like domain; the product of F26G1.3 belongs to a family of apparently nematode-specific proteins whose function is not yet known.
WBGene00019442	K06C4.1	7.18466	0.233681	0.111416	2.09737	0.0359608	0.999955
WBGene00008584	irg-4	26.9307	0.229542	0.108931	2.10723	0.0350976	0.999955	F08G5.6 encodes a CUB-like domain-containing protein; F08G5.6 is involved in the transcriptional, innate immune response towards several different bacterial pathogens; an F08G5.6::gfp promoter fusion is expressed in the intestine and in head neurons; F08G5.6 expression is positively regulated in the intestine by the ELT-2 GATA transcription factor.
WBGene00015605	C08E3.13	9.85022	0.224481	0.113809	1.97244	0.0485593	0.999955	C08E3.13 encodes a novel protein; expression studies indicate that C08E3.13 expression is positively regulated by signaling through the DBL-1/TGF-beta signaling pathway; in situ hybridization experiments reveal that C08E3.13 transcripts are expressed in the intestine and the vulva.
WBGene00011424	dhs-31	6.21978	0.223526	0.103033	2.16945	0.0300482	0.999955
WBGene00016999	D1005.5	6.46461	0.222827	0.111249	2.00295	0.0451822	0.999955
WBGene00003764	nlp-26	10.1016	0.221415	0.0982326	2.25399	0.0241967	0.874775	nlp-26 encodes a predicted neuropeptide not found in multigene families within C. elegans and is not clearly related to other well-characterized neuropeptides.
WBGene00050968	R11G10.4	3.43952	0.218553	0.0907371	2.40864	0.0160119	0.657839
WBGene00001602	gln-1	871.496	0.217292	0.105826	2.05331	0.0400426	0.999955
WBGene00006190	str-143	2.51503	0.217064	0.0874075	2.48336	0.013015	0.567141
WBGene00000508	cit-1.2	1889.36	0.217062	0.0803022	2.70306	0.00687045	0.357548	cit-1.2 encodes one of two C. elegans cyclin T orthologs; RNAi experiments indicate that CIT-1.2 functions redundantly with CIT-1.1 to broadly regulate embryonic transcription; by homology, CIT-1.1 and CIT-1.2 are predicted to interact with the CDK-9 kinase to form the P-TEFb transcription elongation factor that in C. elegans is required for Ser2, but not Ser5, phosphorylation in the C-terminal d…
WBGene00015128	B0303.7	864.047	0.216198	0.0931213	2.32168	0.02025	0.771606
WBGene00007450	C08F11.1	4.56893	0.214377	0.108329	1.97894	0.0478232	0.999955
WBGene00020435	T11F8.4	4.23265	0.213543	0.101906	2.09549	0.0361275	0.999955
WBGene00008883	F16B12.7	4.86851	0.213444	0.106198	2.00988	0.0444443	0.999955
WBGene00000556	cnc-2	3.758	0.210517	0.0858672	2.45166	0.01422	0.603556	cnc-2 encodes one of eleven C. elegans caenacin peptides; cnc-2 functions as a secreted antimicrobial peptide in the innate immune response: cnc-2 expression is strongly induced in the epidermis upon infection by the fungal pathogen and overexpression of cnc-2 promotes survival after D. coniospora infection; cnc-2 expression is also induced upon infection by the Gram negative bacterium Serratia m…
WBGene00010171	oac-35	8.6192	0.209934	0.0853662	2.45922	0.013924	0.594088
WBGene00003879	ora-1	7.57139	0.207369	0.0944629	2.19524	0.0281464	0.968294
WBGene00020156	T02B11.4	14.4416	0.206859	0.0985813	2.09836	0.0358734	0.999955
WBGene00005602	srj-14	2.67162	0.206372	0.085382	2.41705	0.0156469	0.647308
WBGene00004023	pho-4	14.4253	0.205934	0.101762	2.02369	0.0430019	0.999955
WBGene00020014	R11G11.6	3.54505	0.205773	0.0915832	2.24684	0.0246501	0.88724
WBGene00007232	C01G10.5	3.47298	0.203388	0.0911476	2.23141	0.0256541	0.915314
WBGene00201301	C10F3.15	2.77639	0.203273	0.0847647	2.39809	0.016481	0.66804
WBGene00011554	T07A5.1	12.8735	0.201504	0.0995716	2.02371	0.0430002	0.999955
WBGene00020784	tat-4	1646.66	0.200005	0.0985038	2.03043	0.042313	0.999955	tat-4 encodes one of six C. elegans subfamily IV P-type ATPase that, by sequence similarity, is proposed to function as an aminophospholipid translocase (flippase); loss of tat-4 function via RNAi or deletion mutation results in no obvious developmental or morphological defects, however tat-4 deletion mutants are hypersensitive to sterol deprivation and this hypersensitivity is enhanced by a muta…
WBGene00271832	Y60C6A.3	18.0369	0.198222	0.0960615	2.06349	0.0390662	0.999955
WBGene00077573	T08G5.15	5.06722	0.197229	0.0911176	2.16455	0.0304221	0.999955
WBGene00007638	C17D12.3	11.3848	0.196818	0.0829159	2.3737	0.0176108	0.70618
WBGene00000621	col-44	10.5941	0.196736	0.0970313	2.02755	0.0426058	0.999955	col-44 encodes a cuticle collagen.
WBGene00010612	K07A1.5	2.76002	0.196105	0.0917005	2.13854	0.0324729	0.999955
WBGene00010170	F56H6.9	10.1699	0.195131	0.0857454	2.27571	0.0228636	0.841472
WBGene00194935	M02G9.4	3.62869	0.195046	0.089337	2.18327	0.0290162	0.98782
WBGene00015398	tag-293	11.6238	0.194492	0.0842238	2.30923	0.020931	0.789915
WBGene00016197	pxl-1	1749.11	0.193344	0.0940123	2.05658	0.0397262	0.999955	pxl-1 encodes proteins containing N-terminal LD motifs and C-terminal LIM domains that is the C. elegans ortholog of vertebrate paxillin; pxl-1 is required for organized myofilament structure in the pharynx and pharyngeal muscle contraction, and hence feeding and viability past the first larval stage; PXL-1 is expressed in body wall and pharyngeal muscle, as well as pharyngeal epithelial cells; P…
WBGene00021249	Y22D7AL.11	2.48815	0.191611	0.0826168	2.31928	0.0203801	0.77449
WBGene00010360	fbxa-96	4.7571	0.189016	0.0900638	2.09869	0.0358441	0.999955	The F-box motif consists of roughly 50 amino acids. There are at least 11 F-box genes encoded by the genome of budding yeast, 22 in Drosophila, and 38 in human beings; but a striking 326 F-box genes are predicted to exist in C. elegans, comprising 1.6% of the protein-coding genome. This disproportionate number of F-box genes is paralleled by the number of Skp-1 homologs (which are potential F-box…
WBGene00219683	anr-32	9.62626	0.187672	0.081226	2.31049	0.0208613	0.789108
WBGene00016063	delm-2	9.6576	0.187241	0.0811426	2.30755	0.0210242	0.789975
WBGene00007658	pals-4	10.8624	0.184943	0.0806764	2.2924	0.0218826	0.816401
WBGene00017466	F14F9.3	10.0635	0.18323	0.0867939	2.11109	0.0347642	0.999955
WBGene00019667	spe-49	2.62374	0.159021	0.0758385	2.09684	0.0360075	0.999955
WBGene00022653	ZK105.1	5.73162	0.157451	0.0751909	2.09402	0.0362584	0.999955
WBGene00007657	pals-3	5.61563	0.156945	0.0750862	2.09019	0.0366006	0.999955
WBGene00004176	pqn-97	1.78393	0.153383	0.0748277	2.04982	0.0403823	NA	Proteins bearing such domains can sometimes stably exist in at least two distinct physical states, each associated with a different phenotype; propagation of one of these traits is achieved by a self-perpetuating change in the protein from one form to the other, mediated by conformational changes in the glutamine/asparagine-rich domain. Prion domains are both modular and transferable to other pro…
WBGene00012856	Y44A6D.6	1.7153	0.150104	0.0741132	2.02534	0.0428326	NA
WBGene00206466	T08D10.5	1.86743	0.149277	0.0738631	2.021	0.0432796	NA
WBGene00003663	nhr-73	6.2322	0.147958	0.0730766	2.0247	0.0428986	0.999955	nhr-73 encodes a member of the superfamily of nuclear receptors, which is one of the most abundant class of transcriptional regulators; nuclear receptors have a well conserved DNA binding domain and a less conserved C-terminal ligand binding domain; expression studies using GFP fusions indicate that nhr-73 is expressed exclusively in lateral seam cells; expression of nhr-73 is seen in early embry…
WBGene00007323	fbxa-155	4.4462	0.140346	0.0714081	1.9654	0.0493676	0.999955
Table S4. List of genes significantly up-regulated in the ngn-1(ok2200) comparative transcriptome when compared to wild type (p < 0.05). Gene ID, gene identity; gene name, commonly used gene name/cosmid name; Base mean, mean of normalized counts for that gene; log2(FC), log2 fold-change in gene expression when compared to wild type; P-value, significance; P-adj, significance when adjusted for fal…
