# Supplementary material
Source: publisher figshare collection journal article supplement (https://gsajournals.figshare.com/articles/dataset/_/12034392)
Supplement: Supplementary file 3 [file 1]

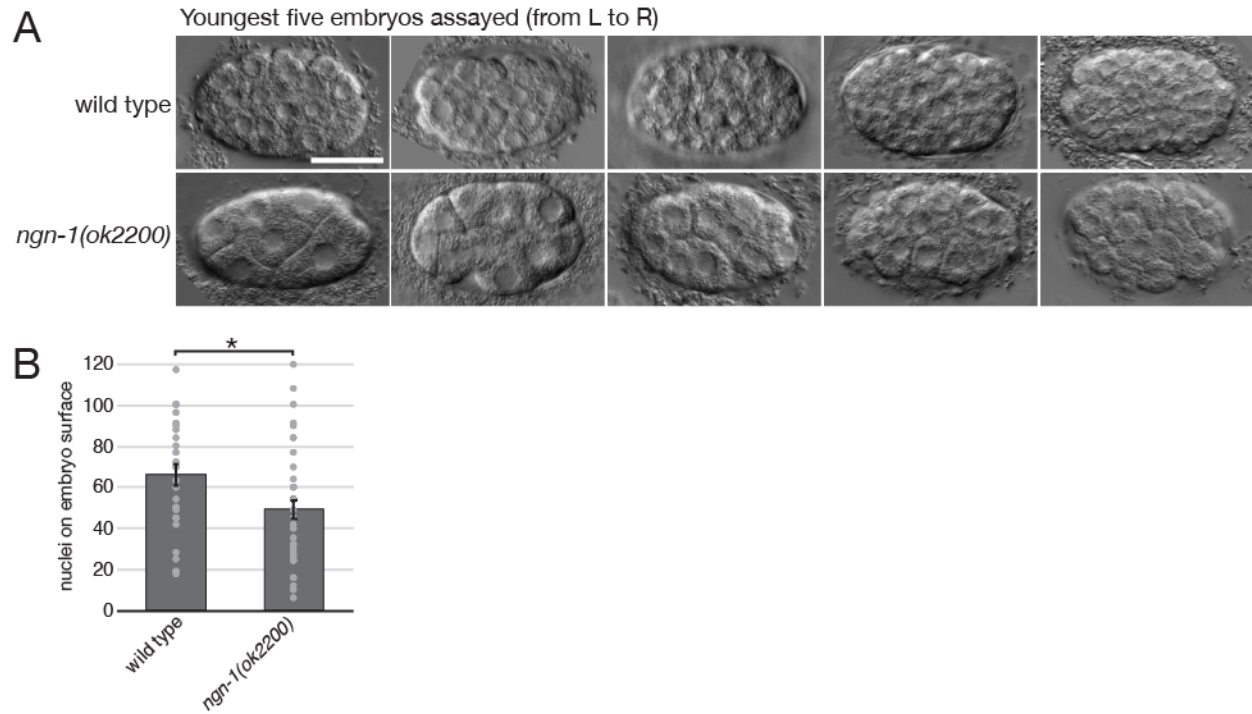

**Figure S1.** *ngn-1* mutants show precocious embryo laying. (A) Images of the youngest five wild type and *ngn-1(ok2200)* mutant embryos assayed. (B) Average number of nuclei visible on the surface of embryos in wild type and *ngn-1(ok2200)* mutants. Error bars show standard error of the mean and circles show individual data points (\*  $p < 0.05$ , student's t-test).
